# Supplementary material for: Modelling the global atmospheric transport and deposition of radionuclides from the Fukushima Dai-ichi nuclear accident
Source: Copernicus journal article supplement (doi:10.5194/acp-13-1425-2013), 2013-02-05
Supplement: Supplementary file 1 [file acp-13-1425-2013-supplement.pdf]

# **Supplement to “Modelling the global atmospheric transport and deposition of radionuclides from the Fukushima Dai-ichi nuclear accident”**

**T. Christoudias<sup>1</sup> and J. Lelieveld<sup>1,2</sup>**

<sup>1</sup>The Cyprus Institute, Nicosia, Cyprus

<sup>2</sup>Max Planck Institute of Chemistry, Mainz, Germany

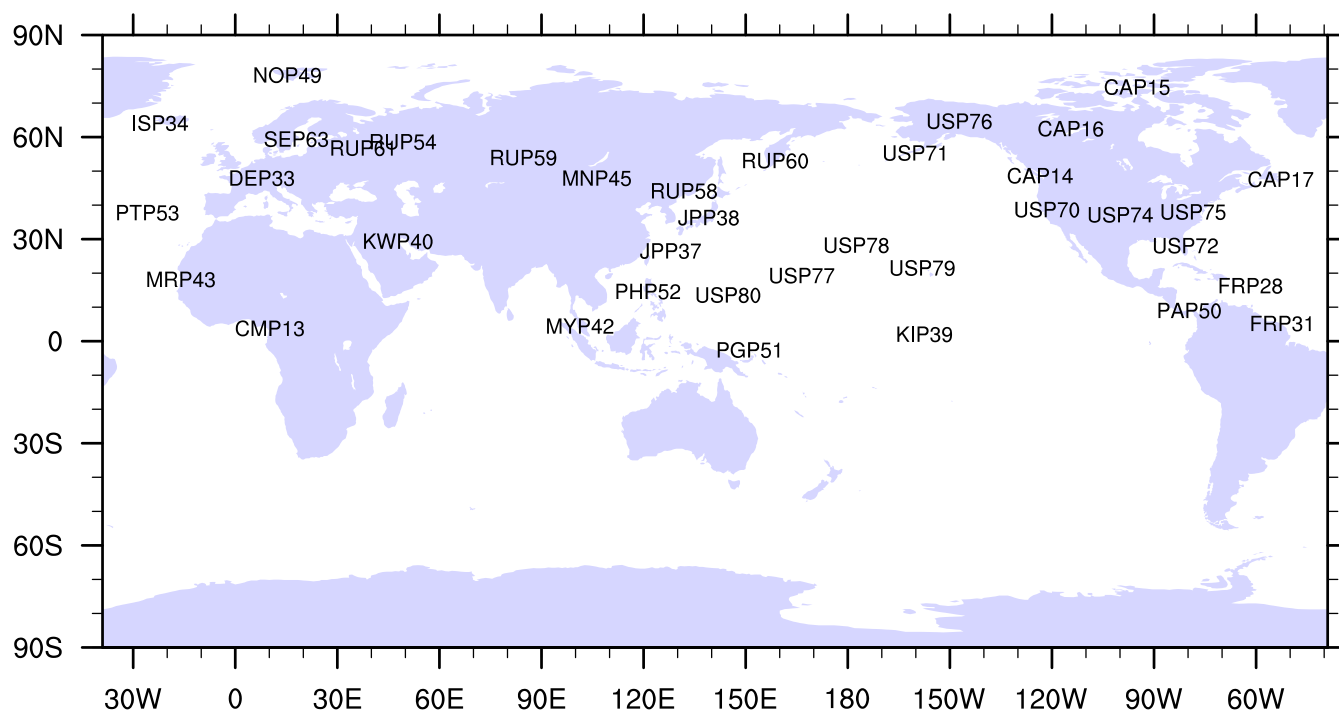

**Fig. 1.** Comprehensive Nuclear-Test-Ban Treaty Organisation (CTBTO) measurement network station location and code for radionuclides for the subset of stations with measurements available used in our study.

$^{137}\text{Cs}$ 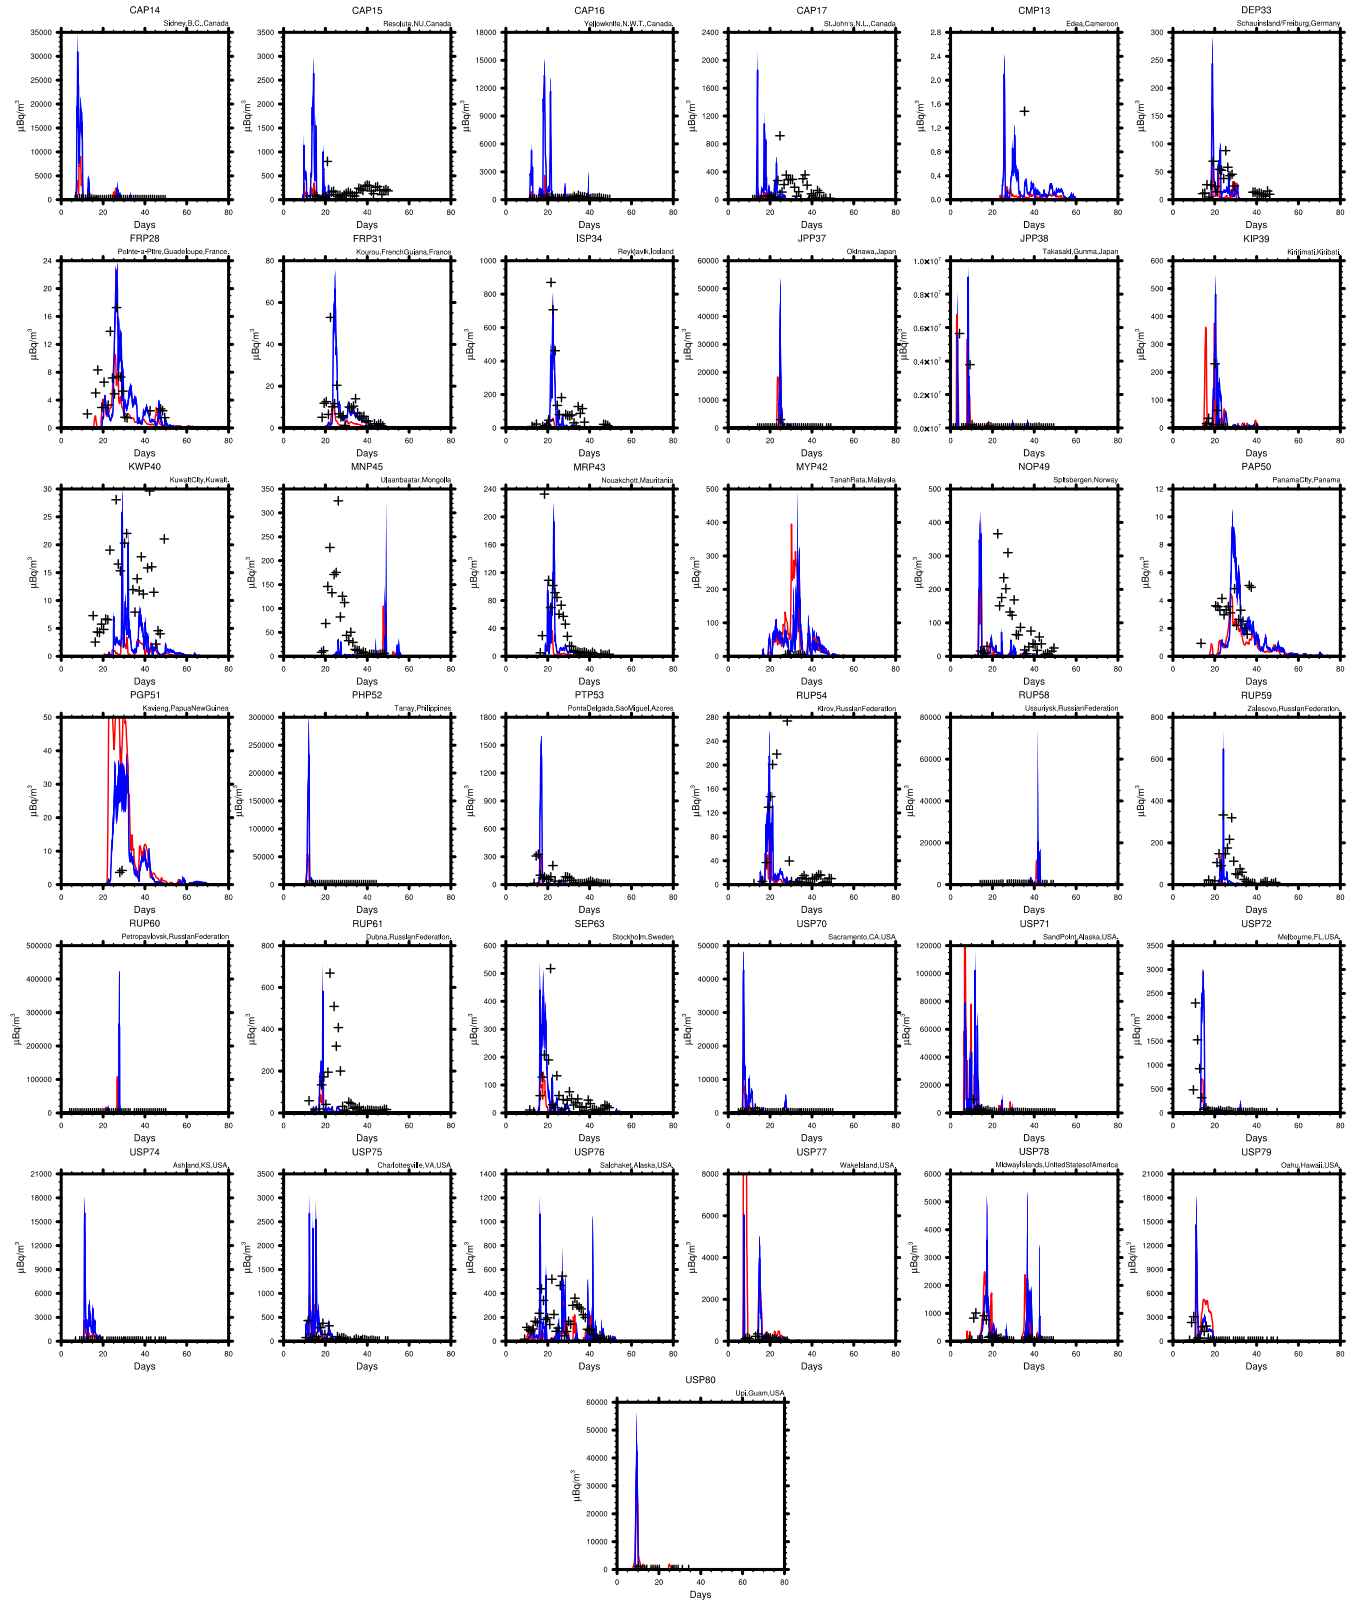

**Fig. 2.** Observed (black crosses) and modeled (solid lines) surface concentrations of  $^{137}\text{Cs}$  at CTBTO stations. T255 horizontal resolution is shown in blue and T106 in red. The time axis represents the fraction (percentage) of the year 2011.

$^{137}\text{Cs}$ 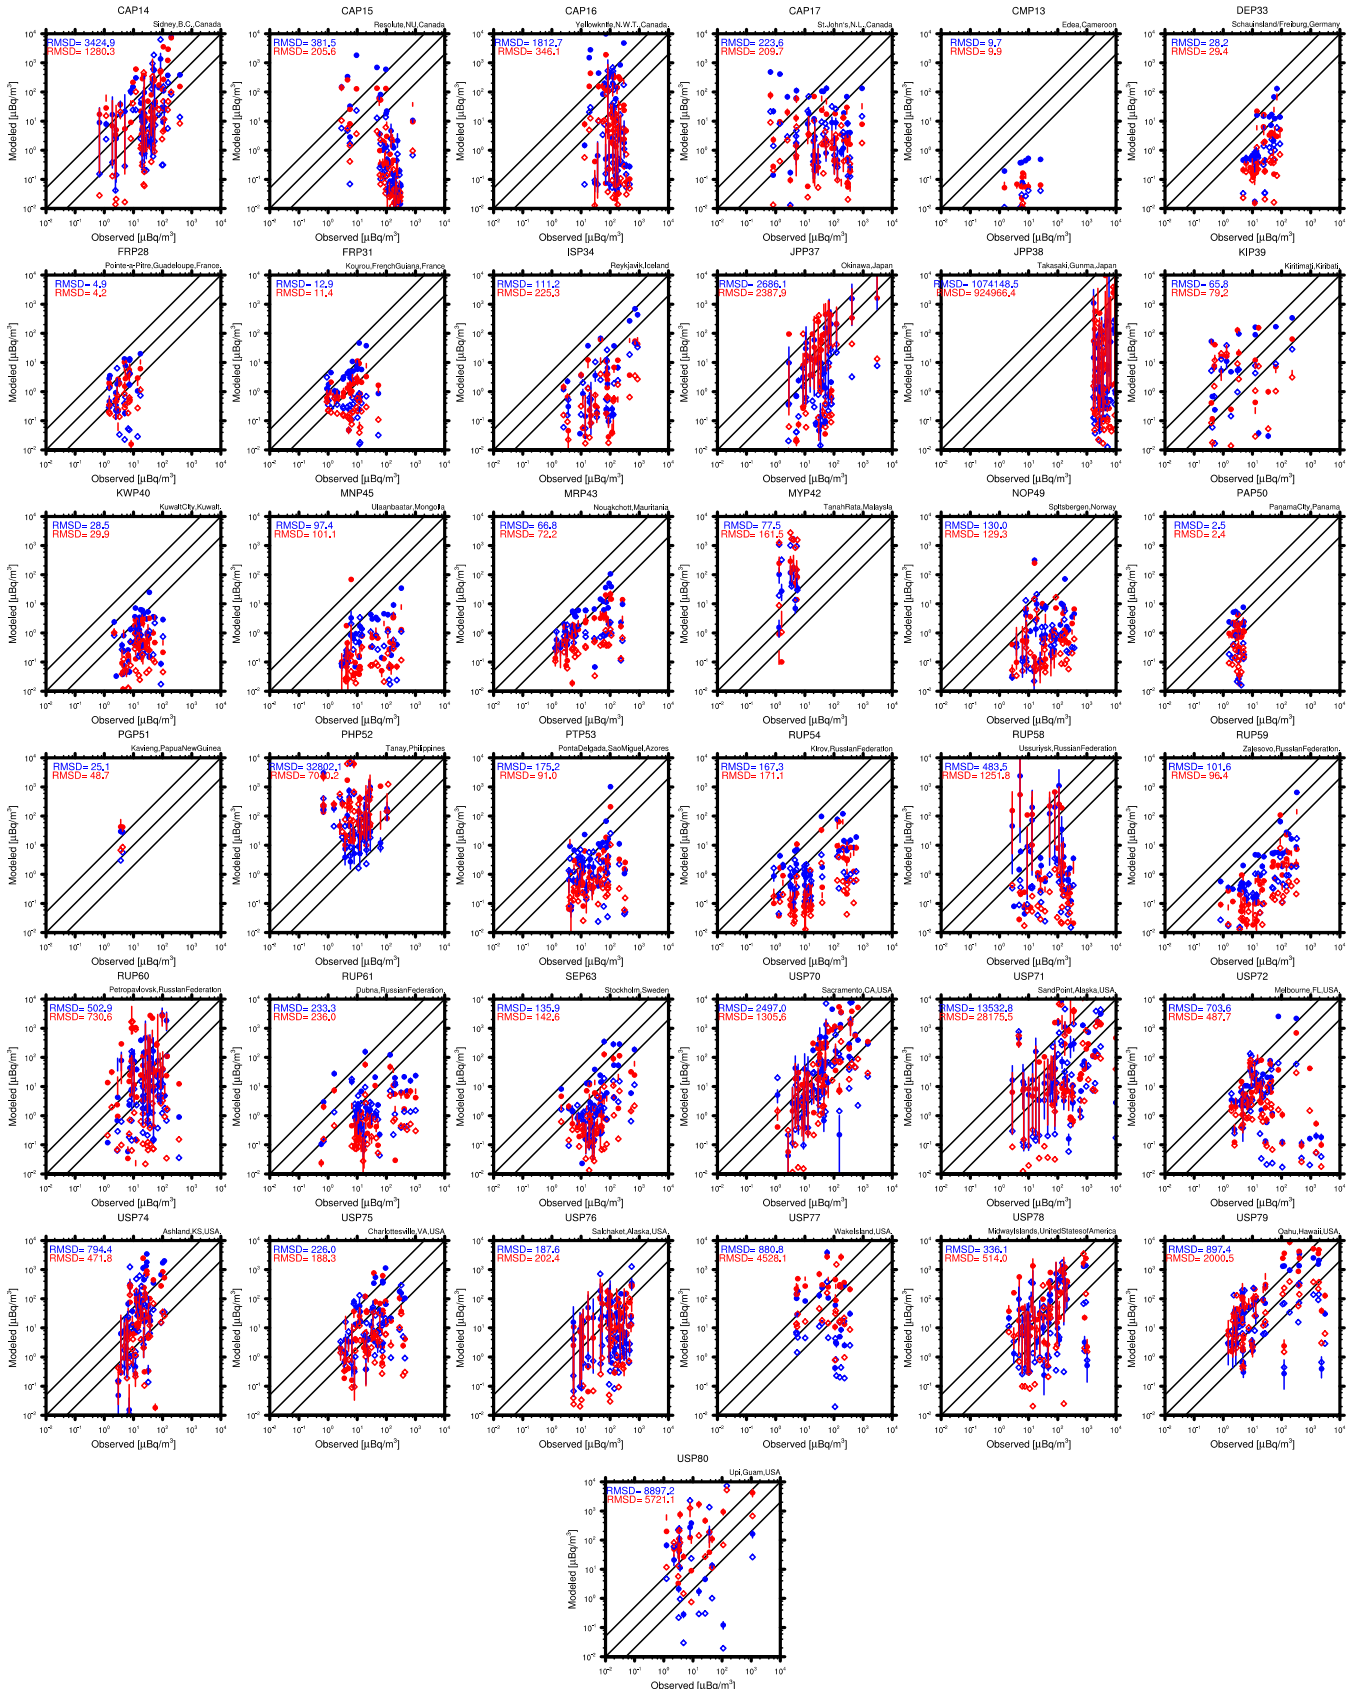

**Fig. 3.** Modeled versus observed surface concentrations of  $^{137}\text{Cs}$  at CTBTO stations. The diagonal lines represent the 1:1 ratio and the factor of 5 over- and underestimates.

131

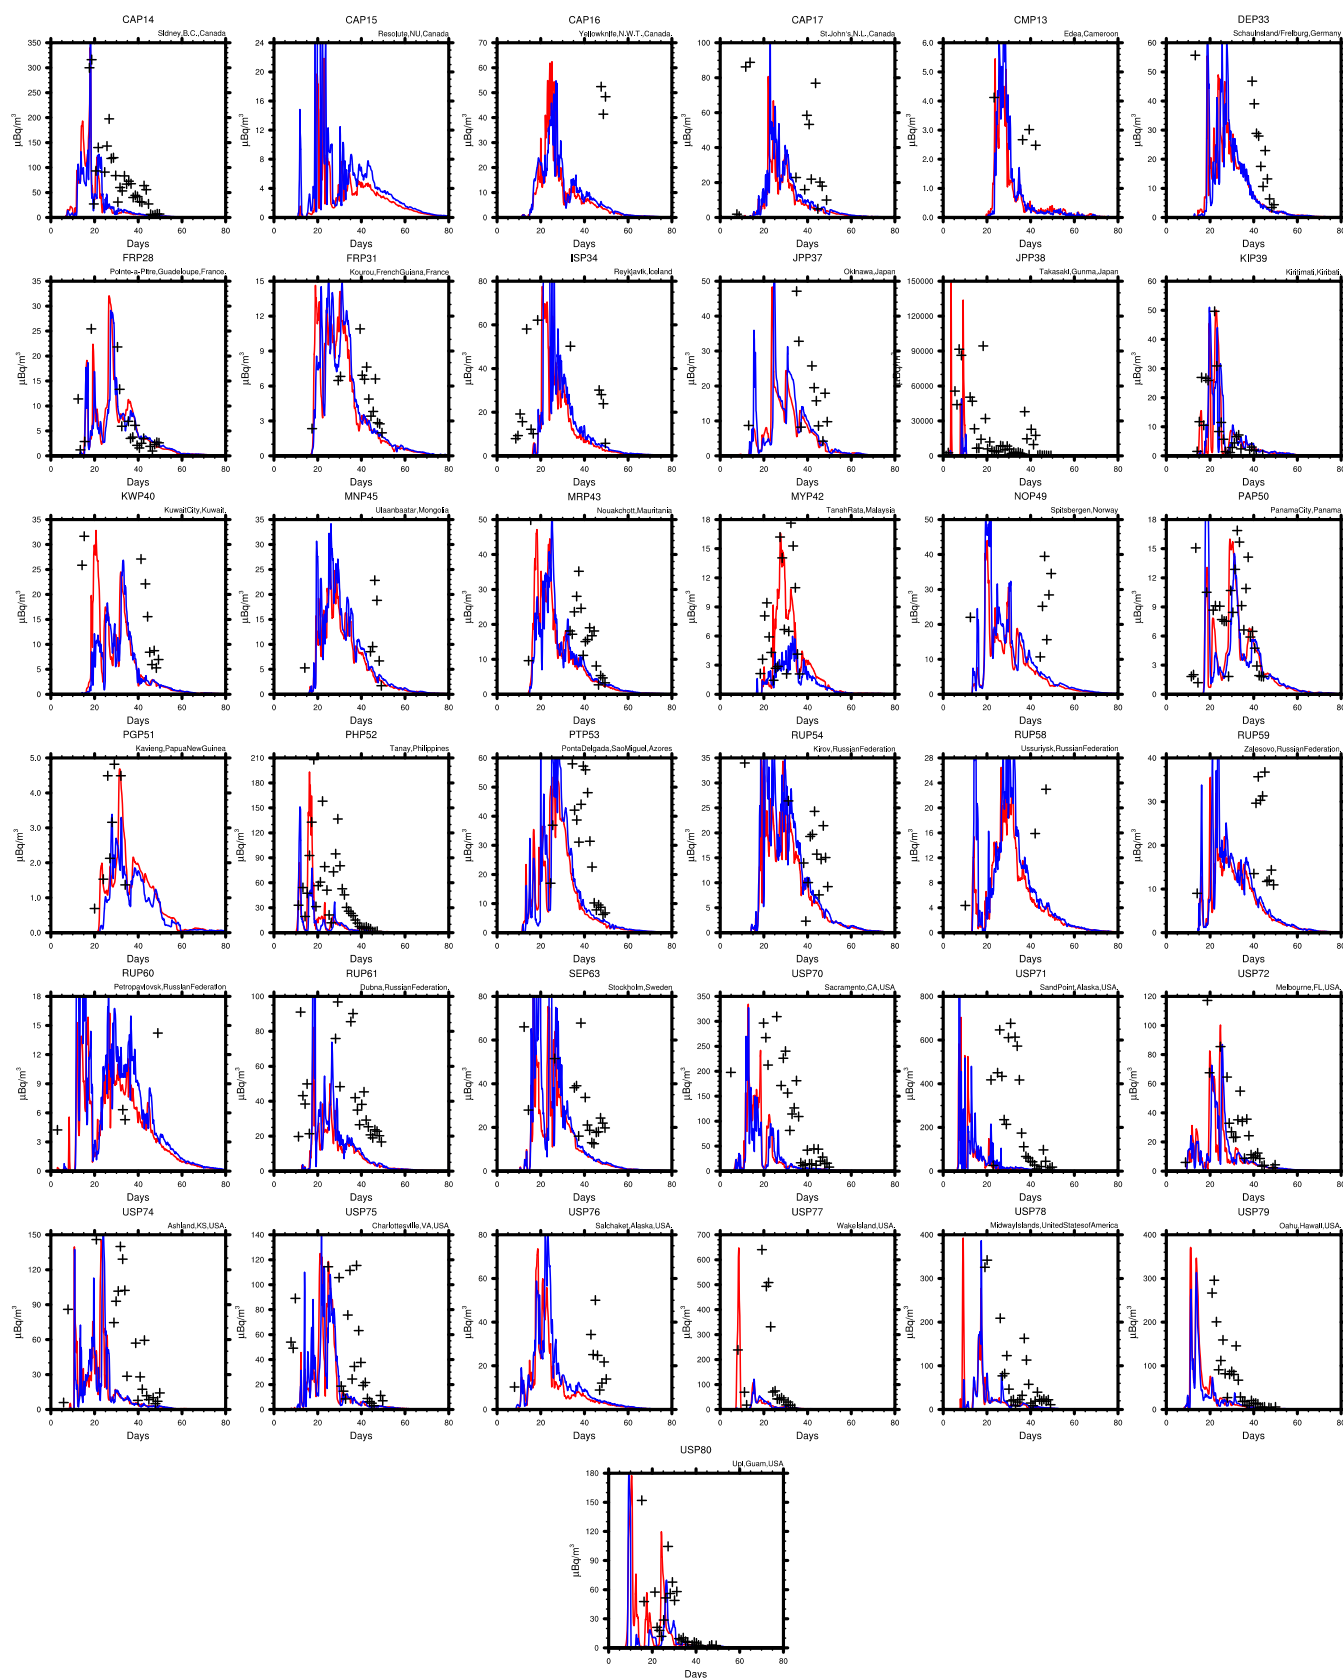

**Fig. 4.** Observed (black crosses) and modeled (solid lines) surface concentrations of  $^{131}\text{I}$  at CTBTO stations. T255 horizontal resolution is shown in blue and T106 in red. The time axis represents the fraction (percentage) of the year 2011.

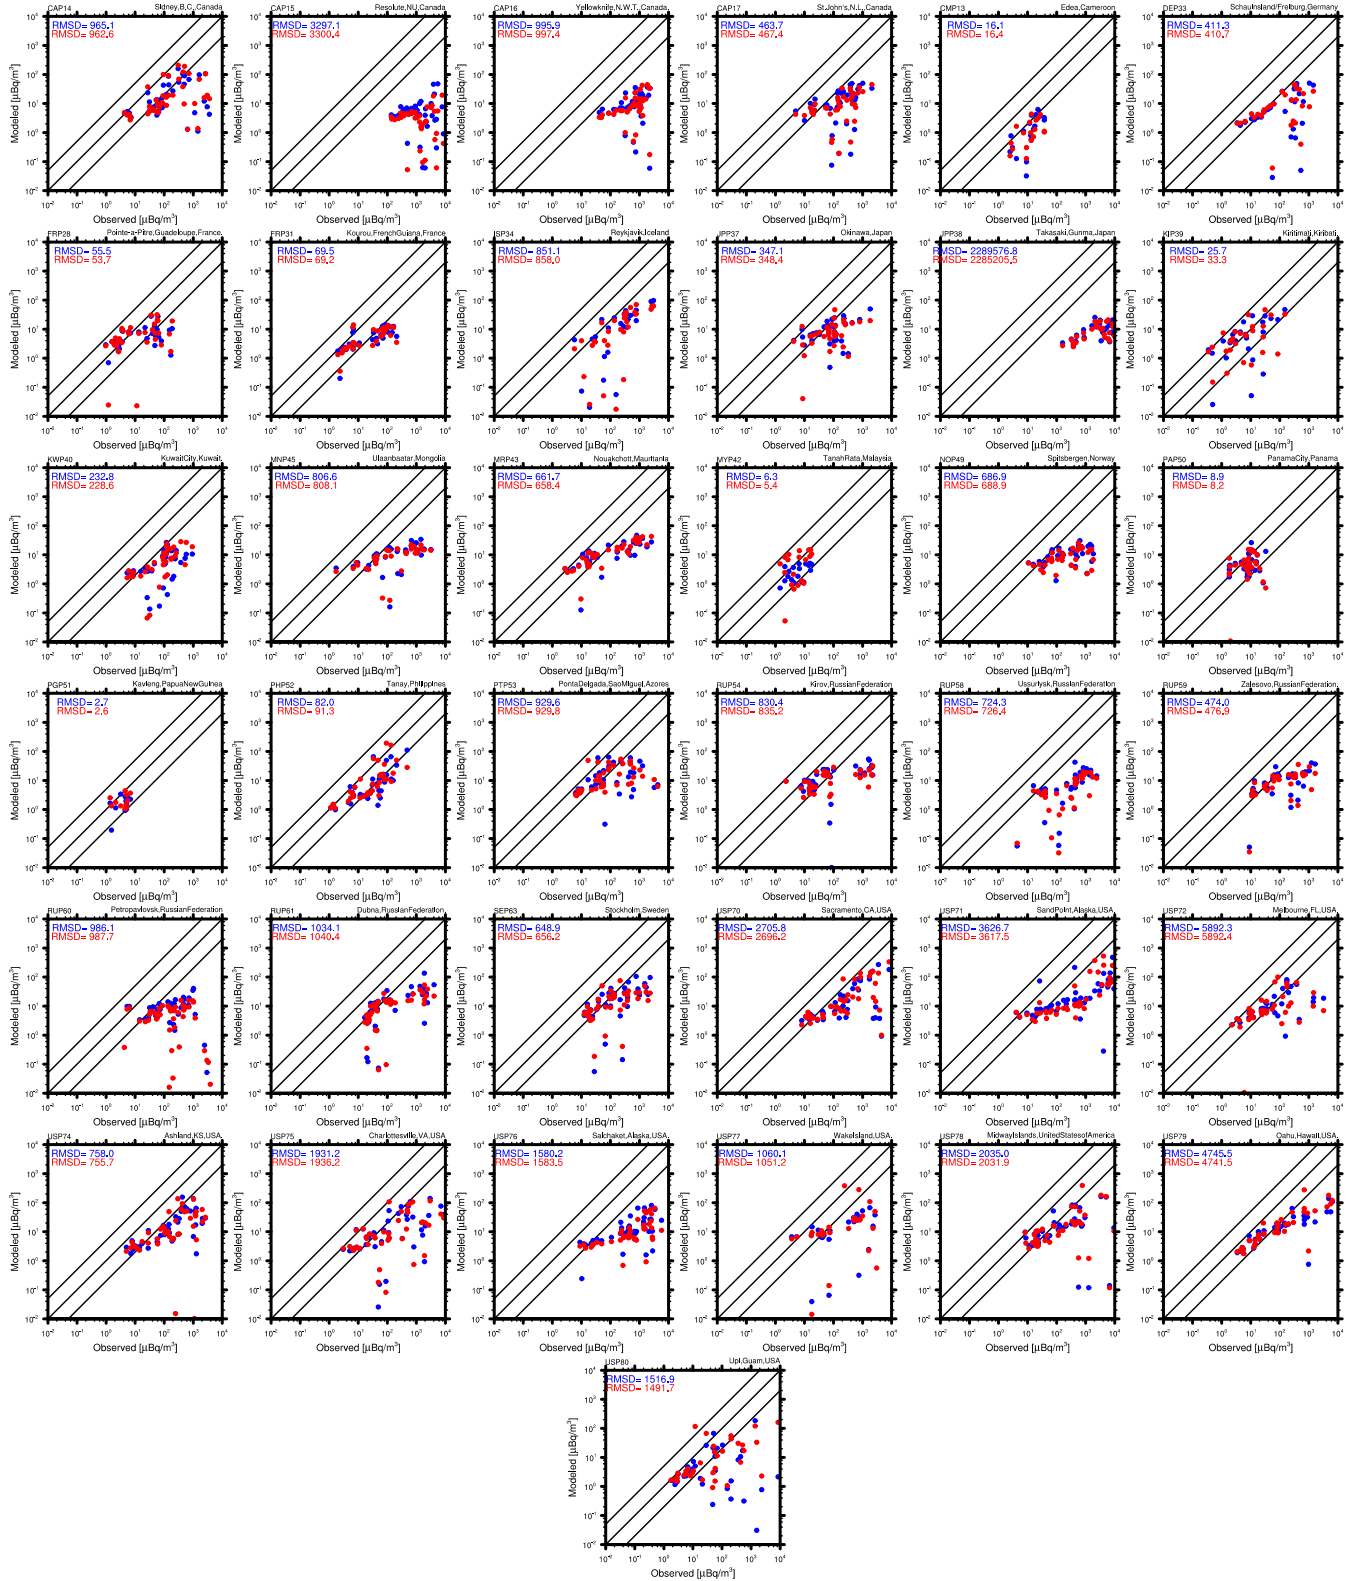

**Fig. 5.** Modeled versus observed surface concentrations of  $^{131}\text{I}$  at CTBTO stations. The diagonal lines represent the 1:1 ratio and the factor of 5 over- and underestimates.
